# Supplementary material for: A review of commercial plastic waste recycling into graphene materials
Source: Royal Society of Chemistry journal article supplement (doi:10.1039/d5ra00288e), 2025-01-01
Supplement: d5ra00288e1.pdf [file d5ra00288e1.pdf]

## **Supporting Information**

### **A review of commercial plastic waste recycling into graphene material**

Phuoc-Anh Le<sup>1\*</sup>

<sup>1</sup> Institute of Chemistry, Vietnam Academy of Science and Technology, Hanoi 100000, Vietnam

### **Corresponding author:**

Phuoc-Anh Le; Email: [lephuocanh@ich.vast.vn](mailto:lephuocanh@ich.vast.vn)

**Table S1.** Some typical organizations focus on recycling plastic and rubber materials into carbon materials and related products

| Company                                                                                         | Country                 | Techniques                                                                                                                             | Output products                                                                                                                                      |
|-------------------------------------------------------------------------------------------------|-------------------------|----------------------------------------------------------------------------------------------------------------------------------------|------------------------------------------------------------------------------------------------------------------------------------------------------|
| Cecilia<br><a href="https://www.ceciliaenergy.com/">https://www.ceciliaenergy.com/</a>          | USA                     | Modules system with zero CO <sub>2</sub> resistance                                                                                    | <ul style="list-style-type: none"> <li>- Performance carbon powder</li> <li>- Recycled polymer composites</li> <li>- Product inquiry form</li> </ul> |
| Eco Carbon<br><a href="https://ecocarbons.org/">https://ecocarbons.org/</a>                     | USA                     | N/A                                                                                                                                    | <ul style="list-style-type: none"> <li>- Activated carbon</li> <li>- Carbon molecular sieve</li> <li>- Synthetic graphite</li> </ul>                 |
| Clariter<br><a href="https://clariter.com/">https://clariter.com/</a>                           | Luxembourg              | <ul style="list-style-type: none"> <li>- Thermal cracking</li> <li>- Hydro-refining</li> <li>- Distillation and unification</li> </ul> | Sustainable petrochemicals by upcycling plastic waste: high-value waxes, oils, and solvents                                                          |
| Enerkem<br><a href="https://enerkem.com/">https://enerkem.com/</a>                              | Canada                  | <ul style="list-style-type: none"> <li>- fluidized bed gasification vessel</li> <li>-</li> </ul>                                       | biofuels and renewable chemicals.                                                                                                                    |
| Vow ASA<br><a href="https://www.vowasa.com/">https://www.vowasa.com/</a>                        | Norway                  | Biogreen pyrolysis                                                                                                                     | convert plastic waste into fuel                                                                                                                      |
| Symius<br><a href="https://www.symius.com/">https://www.symius.com/</a>                         | USA                     | In situ exfoliation method to fabricate a graphene-reinforced polymer matrix composite                                                 | graphene polymer composites                                                                                                                          |
| GrapheneGolden<br><a href="https://graphenegolden.com/">https://graphenegolden.com/</a>         | Kingdom of Saudi Arabia | N/A                                                                                                                                    | converting plastic trash into high-quality graphene                                                                                                  |
| EcoRub<br><a href="https://2dfab.com/">https://2dfab.com/</a>                                   | Sweden                  | N/A                                                                                                                                    | graphene in recycled rubber materials                                                                                                                |
| GOLeafe<br><a href="https://goleafe.com/">https://goleafe.com/</a>                              | USA                     | N/A                                                                                                                                    | extracts graphene oxide from organic materials, including waste tires                                                                                |
| Gerdaugraphene<br><a href="https://www.gerdaugraphene.com/">https://www.gerdaugraphene.com/</a> | Brazil                  | N/A                                                                                                                                    |                                                                                                                                                      |
| Space Blue                                                                                      | UK                      | N/A                                                                                                                                    | recycle tyre rubber to                                                                                                                               |

|                                                                                                     |     |                                      |                                                  |
|-----------------------------------------------------------------------------------------------------|-----|--------------------------------------|--------------------------------------------------|
| The University of Manchester<br><a href="https://spaceblue.co.uk/">https://spaceblue.co.uk/</a>     |     |                                      | graphene                                         |
| Universal Matter<br><a href="https://www.universalmatter.com/">https://www.universalmatter.com/</a> | USA | flash joule<br>heating<br>technology | convert diverse carbon<br>feedstocks to graphene |
